# Supplementary material
Source: PubMed Central journal article supplement (PMC4402266)
Supplement: NIHMS667044-supplement-1.pdf [file NIHMS667044-supplement-1.pdf]

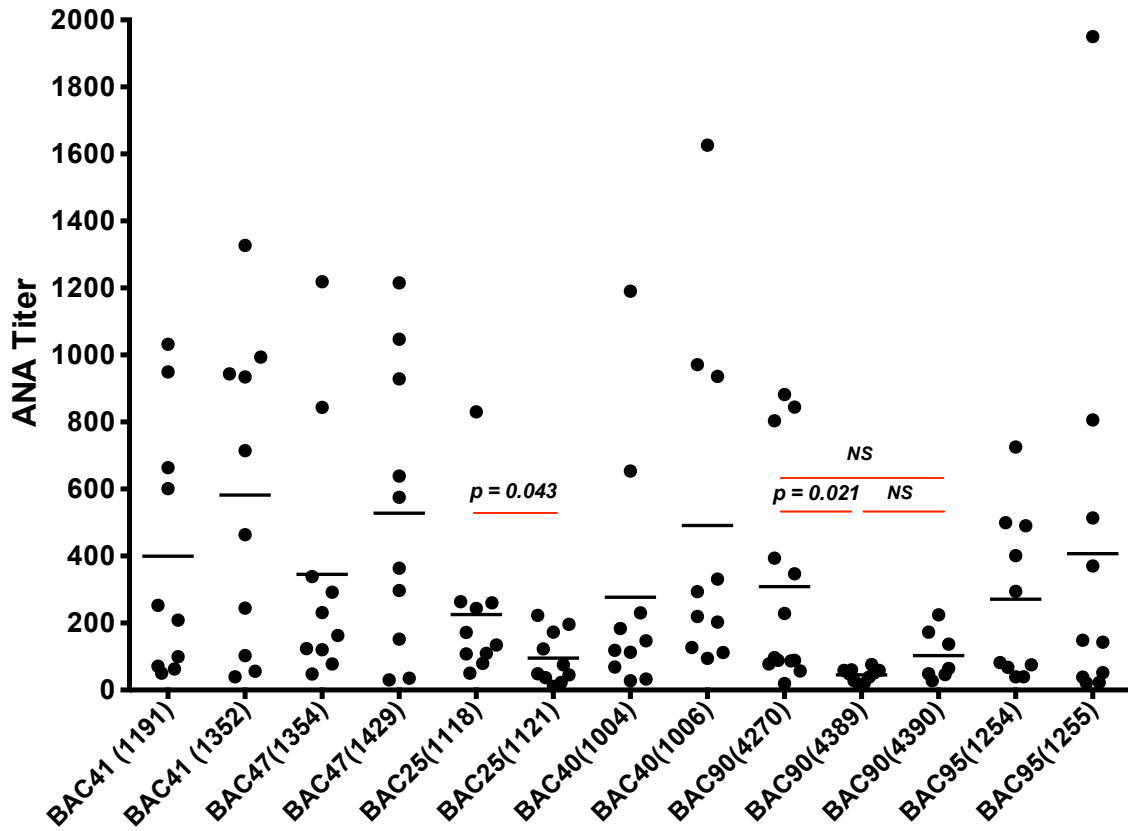

**Supplementary Figure 1: ANA production in B6.Sle1b mice expressing each founder line for a given BAC transgenic strain.** Each founder line for a given BAC transgene carrying B6 allele(s) was introduced to B6.Sle1b mice. Serum ANA titers were measured by ELISA at 7 mo of age. The horizontal bars indicate the mean values.  $*p < 0.05$  considered significant. NS, not significant.

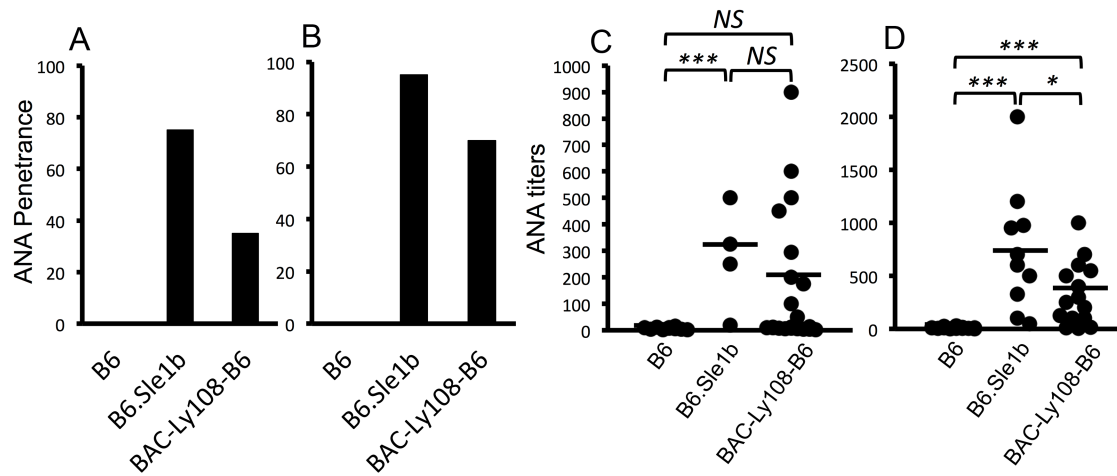

**Supplementary Figure 2: Partial reduction in ANA production in B6.Sle1b mice transgenically expressing B6 Ly108.** BAC transgene carrying B6 allele of Ly108 was introduced to B6.Sle1b mice (designated *Sle1b*-BAC-108). **(A- B)** IgG ANA penetrance or positivity and **(C- D)** ANA titers from 7 (left panel) and 9 (right panel) month old B6, B6.Sle1b, and *Sle1b*-BAC-Ly108 mice. \* $p < 0.05$ , \*\* $p < 0.01$ , \*\*\* $p < 0.001$ .

**A** B Cells – 2 months

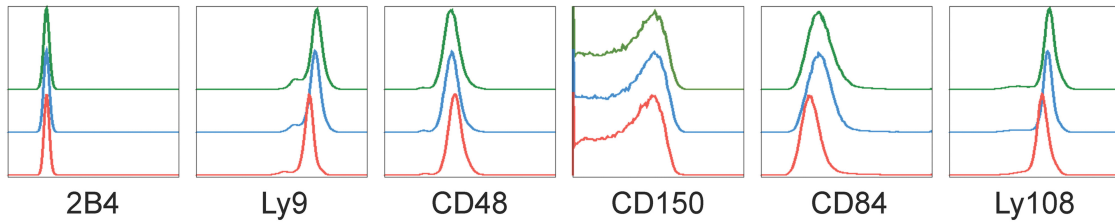

**B** B Cells – 8 months

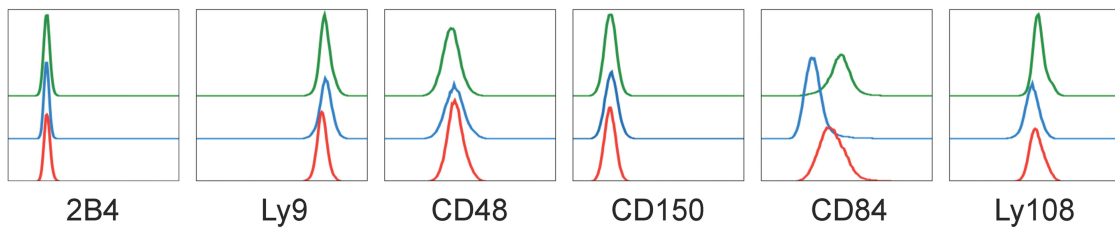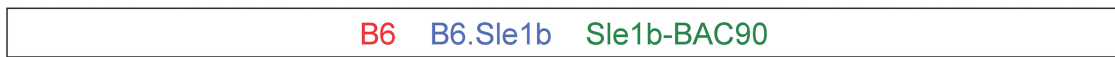

**Supplementary Figure 3: Characterization of *Sle1b*-BAC90 mice.** Flow cytometric analysis of B cell CD84 and Ly108 expression levels. Representative histogram plots of SLAM receptor expression on B220<sup>+</sup> B cells in 2 mo (**A**) and 8 mo (**B**) old mice of indicated genotypes. These data are representative of 5-6 mice per group.

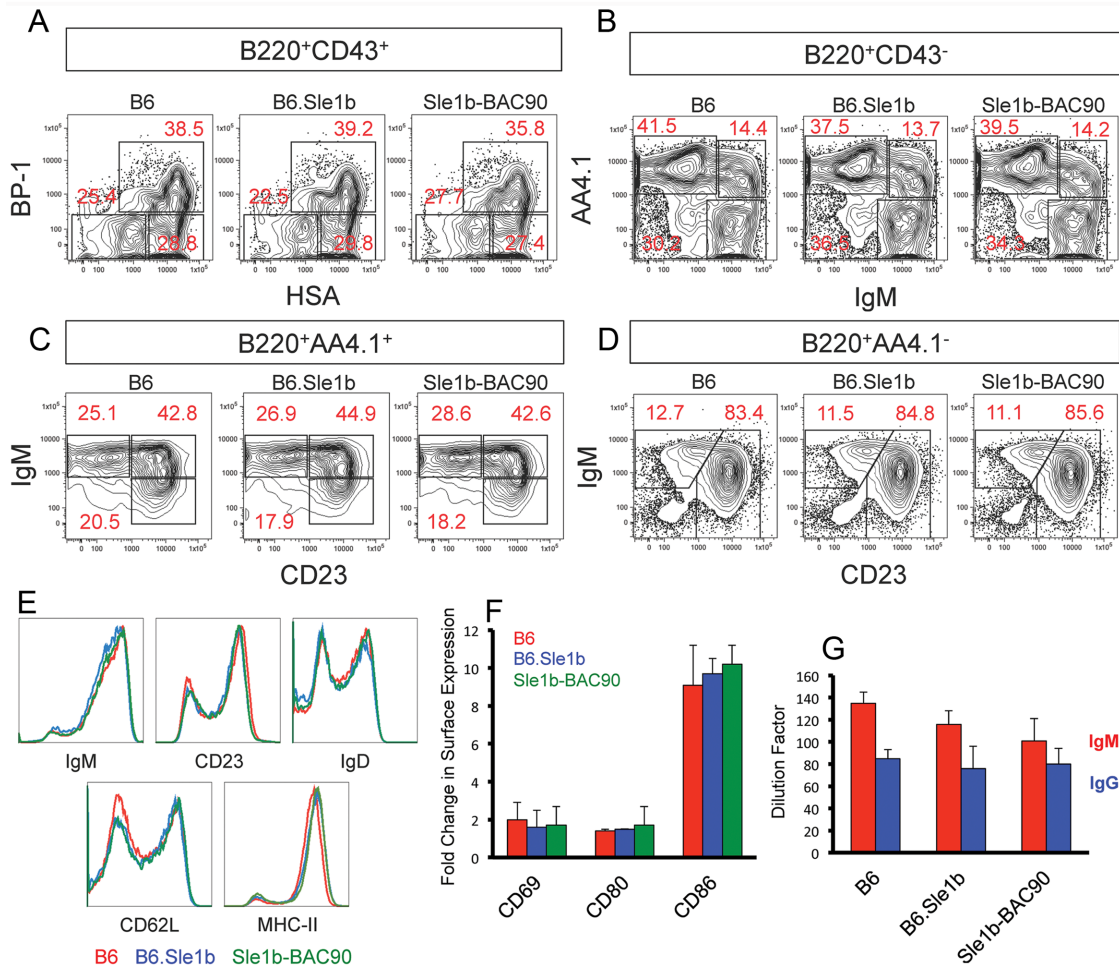

**Supplementary Figure 4: Reduced signaling capacity exhibited by B6.Sle1b B cells is not due to primary developmental defects.** (A-B) Bone marrow B cell developmental stages: A fraction (B220<sup>+</sup>CD43<sup>+</sup>HSA<sup>-</sup>BP-1<sup>-</sup>), B fraction (B220<sup>+</sup>CD43<sup>+</sup>HSA<sup>+</sup>BP-1<sup>-</sup>), C fraction (B220<sup>+</sup>CD43<sup>+</sup>HSA<sup>+</sup>BP-1<sup>+</sup>), D fraction (B220<sup>+</sup>CD43<sup>-</sup>IgM<sup>-</sup>AA4.1<sup>+</sup>), E fraction (B220<sup>+</sup>CD43<sup>-</sup>IgM<sup>+</sup>AA4.1<sup>+</sup>), F fraction (B220<sup>+</sup>CD43<sup>-</sup>IgM<sup>+</sup>AA4.1<sup>-</sup>). (C-D) Splenic B cell developmental stages: T1 (B220<sup>+</sup>AA4.1<sup>+</sup>CD23<sup>-</sup>IgM<sup>+</sup>), T2 (B220<sup>+</sup>AA4.1<sup>+</sup>CD23<sup>+</sup>IgM<sup>+</sup>), T3 (B220<sup>+</sup>AA4.1<sup>+</sup>CD23<sup>+</sup>IgM<sup>-</sup>), marginal zone B cells (B220<sup>+</sup>AA4.1<sup>-</sup>CD23<sup>-</sup>IgM<sup>+</sup>), mature B cells (B220<sup>+</sup>AA4.1<sup>-</sup>CD23<sup>+</sup>IgM<sup>+</sup>). These data are representative of 8-10 mice per group. (E) Histogram plots show levels of IgM, CD23, IgD, CD62L, and MHC-II on B cells for each indicated group of mice. Data is representative of 5-6 mice per group. (F) CD69, CD80, and CD86 receptor expression on B cells after anti-IgM stimulation for 24 hours. MFI values were normalized to B6 controls to calculate fold change. These data represent 4-5 mice per group. (G) Total IgM and IgG titers measured in supernatants after anti-IgM stimulation of B cells for 24 hours. These data are representative of 4-5 mice per group.
